# Supplementary figures and images for: Rag1 and Rag2 Gene Expressions Identify Lymphopoietic Tissues in Larvae of Rice-Field Eel (Monopterus albus)
Source: MDPI journal article supplement (doi:10.3390/ijms23147546), 2022-07-07

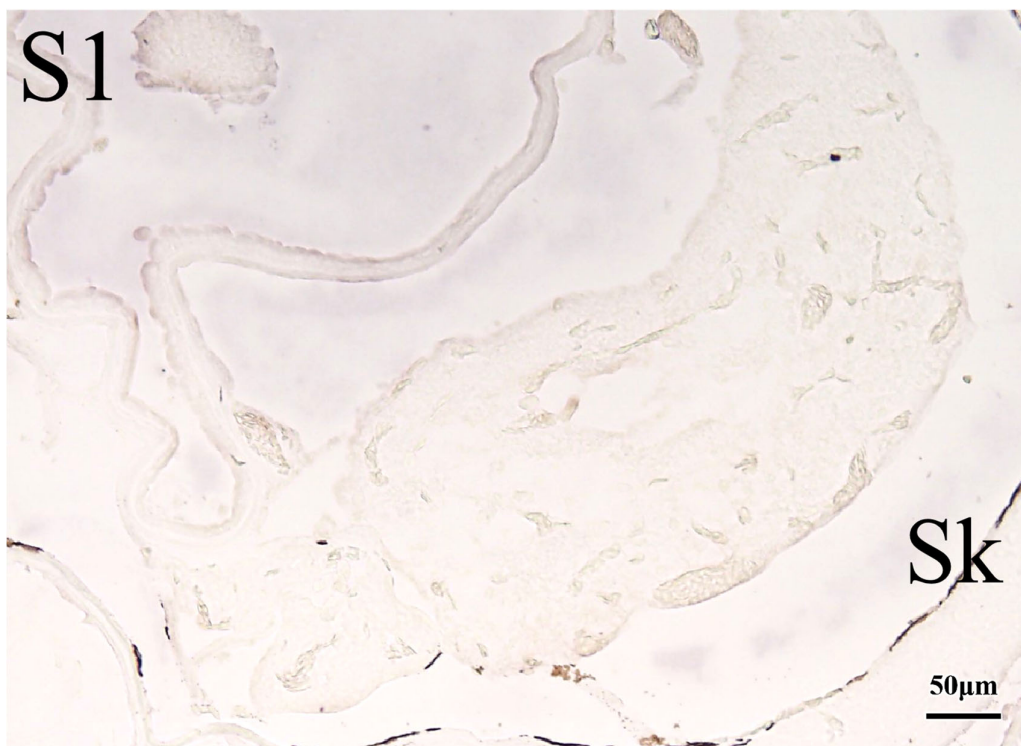

**Figure S1.** Negative control of *rags* gene expression in liver. NBT/BCIP staining. Bars: 50 µm. Sk: skin.

Supplement: s1 [file s1]
